# Supplementary material for: Circulating Tumor Cells from Patients with Advanced Prostate and Breast Cancer Display Both Epithelial and Mesenchymal Markers
Source: Oxford University Press journal article supplement (doi:10.1158/1541-7786.mcr-10-0490), 2011-06-10
Supplement: 15417786mcr100490-sup-mcr_10-0490marengo_t4_f4.pdf [file 15417786mcr100490-sup-mcr_10-0490marengo_t4_f4.pdf]

### Supplementary Data

| Antigen                         | Product                                                         | Positive Control          | Negative Control  | Leukocyte Expression | Dilution |
|---------------------------------|-----------------------------------------------------------------|---------------------------|-------------------|----------------------|----------|
| <b>Vimentin (IF)</b>            | BD Biosciences, mouse monoclonal IgG1, 550513                   | PBMCs, PC-3, DU145        | T47D, LnCAP, mock | Yes                  | 2:225    |
| <b>N-cadherin (IF, WB)</b>      | BD Biosciences (San Jose, CA), mouse monoclonal IgG1, 610920    | Sarcoma, rat brain, PC-3  | PBMCs, mock       | No                   | 4:225    |
| <b>Cytokeratin (pan-CK, IF)</b> | AbD Serotec (Raleigh, NC), mouse monoclonal IgG1, MCA1907HT     | T47D, DU145               | PBMCs, mock       | No                   | 10:225   |
| <b>CD45 (IF)</b>                | Invitrogen (Carlsbad, CA), mouse IgG1, HI30, MHCD4500           | PBMC                      | PC-3, DU145, mock | Yes                  | 5:225    |
| <b>CD133 (IF) (PROM1)</b>       | Novus Biologics (Littleton, CO), polyclonal rabbit, NB120-16518 | CaCo-2 colon cancer cells | PMBCs, mock       | Variable             | 4:225    |
| <b>O-cadherin (IF, WB)</b>      | Invitrogen (Carlsbad, CA), mouse IgG1 kappa, 5B2H5, 32-1700     | PC-3                      | PBMCs, mock, T47D | No                   | 5:225    |
| <b>E-cadherin (IF, WB)</b>      | BD Biosciences (San Jose, CA), mouse IgG2a, 612131              | T47D, PC-3                | PMBCs, mock       | No                   | 4:225    |

**Supplementary table 1.** EMT/stemness antigens assessed in CTCs and control cells. IF=immunofluorescence. WB=western blot.

| <b>DEMOGRAPHICS</b>                                             |  | <b>N=16</b>   |
|-----------------------------------------------------------------|--|---------------|
| Median Age (range)                                              |  | 61 (48-81)    |
| <u>Race, Ethnicity</u>                                          |  |               |
| White, non-hispanic                                             |  | 44 %          |
| Black, non-hispanic                                             |  | 50 %          |
| Asian, non-hispanic                                             |  | 6 %           |
| <b>BASELINE DISEASE HISTORY</b>                                 |  |               |
| ER/PR positivity                                                |  | 56% / 50%     |
| HER (negative, 1+, 2+)                                          |  | 60% , 27%, 13 |
| Median Baseline Pain, range                                     |  | 0 (0-6)       |
| Median Karnofsky Performance Status<br>(range)                  |  | 90 (70-90)    |
| Median # of Prior Hormonal Therapies<br>(range)                 |  | 1 (0-4)       |
| Prior Chemotherapy                                              |  | 81%           |
| <b>SITES OF METASTATIC DISEASE</b>                              |  |               |
| Visceral (lung or liver)                                        |  | 75%           |
| Lymph node only                                                 |  | 0 %           |
| Lymph Node/, soft tissue, or<br>contralateral breast only       |  | 13%           |
| <u>Bone Metastatic:</u>                                         |  |               |
| Bone metastases with lymph nodes<br>(no visceral metastases)    |  | 0 %           |
| Bone metastases without lymph nodes<br>(no visceral metastases) |  | 13 %          |

**Supplementary Table 2.** Baseline demographic and clinical characteristics of the women with metastatic BC in this study (n=16). Pain is scored as a linear analog scale (0-10 range).

| Subject Number | CTC Count (Cellsearch) <sup>i</sup> | Vimentin (+) CTCs / Total Manual CTC Count <sup>ii</sup> |
|----------------|-------------------------------------|----------------------------------------------------------|
| 1              | 5                                   | 4/6                                                      |
| 2              | 4                                   | 2/2                                                      |
| 3              | 54                                  | 11/11                                                    |
| 4              | 45                                  | 6/10                                                     |
| 5              | 626                                 | 5/8                                                      |
| 6              | 110                                 | 17/21                                                    |
| 7              | 182                                 | 5/6                                                      |
| 8              | 17                                  | 13/16                                                    |
| 9              | 19                                  | 33/34                                                    |
| 10             | 34                                  | 12/12                                                    |
| <b>Total</b>   | <b>1127</b>                         | <b>108/126 (86%)</b>                                     |
| Subject Number | CTC Count (Cellsearch)              | N-Cadherin (+) CTCs/ Total Manual CTC Count              |
| 11             | 45                                  | 13/19                                                    |
| 12             | 12                                  | 5/7                                                      |
| 13             | 10                                  | 8/8                                                      |
| 14             | 5                                   | 7/8                                                      |
| 15             | 12                                  | 3/4                                                      |
| 16             | 220                                 | 11/13                                                    |
| 17             | 828                                 | 81/96                                                    |
| 18             | 26                                  | 6/11                                                     |
| 19             | 12                                  | 18/22                                                    |
| 20             | 42                                  | 15/18                                                    |
| 21             | 485                                 | 38/38                                                    |
| <b>Total</b>   | <b>1697</b>                         | <b>205/244 (84%)</b>                                     |
| Subject Number | CTC Count (Cellsearch)              | CD133 (+) CTCs/ Total Manual CTC Count                   |
| 22             | 16                                  | 6/11                                                     |
| 23             | 91                                  | 15/21                                                    |
| 24             | 6                                   | 0/0                                                      |
| 25             | 36                                  | 29/29                                                    |
| 26             | 27                                  | 9/9                                                      |
| 27             | 43                                  | 10/15                                                    |
| 28             | 2                                   | 0/0                                                      |
| 29             | 23                                  | 12/14                                                    |
| 30             | 38                                  | 23/26                                                    |
| 31             | 30                                  | 12/17                                                    |
| 32             | 75                                  | 11/11                                                    |
| <b>Total</b>   | <b>387</b>                          | <b>127/153 (83%)</b>                                     |
| Subject Number | CTC Count (Cellsearch)              | O-Cadherin (+) CTCs/ Total Manual CTC Count              |
| 33             | 198                                 | 23/24                                                    |
| 34             | 180                                 | 18/20                                                    |
| 35             | 102                                 | 9/14                                                     |
| 36             | 7                                   | 15/15                                                    |
| 37             | 55                                  | 11/14                                                    |
| 38             | 112                                 | 31/33                                                    |
| <b>Total</b>   | <b>654</b>                          | <b>107/120 (89%)</b>                                     |

**Supplementary Table 3.** Prevalence of EMT and stemness marker expression in individual subjects with metastatic CRPC from this study.

<sup>i</sup> The middle column represents the CTC Count from the FDA-approved Cellsearch® enumeration of CTCs for each subject.

<sup>ii</sup> Right column represents the ratio of vimentin (co-expression of vimentin ranged from 60-100% of cells in a given individual), N-cadherin (Co-expression of N-cadherin ranged from 55-100% of cells in a given individual), CD133 (CD133 co-expression ranged from 55-100% of evaluable cells in a given individual ), or O-cadherin (Co-expression of O-cadherin ranged from 64-100% of evaluable cells in a given individual) expressing CTCs among the total number of CTCs that were manually enumerated. A CTC was defined as an intact DAPI positive (nucleated) cell that lacked CD45 expression and expressed cytokeratin.

| Subject Number | CTC Count<br>(Cellsearch) | Vimentin (+) CTCs /<br>Total Manual CTC<br>Count   |
|----------------|---------------------------|----------------------------------------------------|
| 1              | 21                        | 0/6                                                |
| 2              | 7                         | 2/2                                                |
| 3              | 8                         | 4/4                                                |
| 4              | 21                        | 1/2                                                |
| 5              | 12                        | 2/2                                                |
| 6              | 188                       | 21/22                                              |
| 7              | 324                       | 29/33                                              |
| 8              | 377                       | 6/23                                               |
| 9              | 0                         | 0/0                                                |
| 10             | 3                         | 0/3                                                |
| <b>Total</b>   | <b>961</b>                | <b>65/97 (67%)</b>                                 |
| Subject Number | CTC Count<br>(Cellsearch) | N-Cadherin (+) CTCs /<br>Total Manual CTC<br>Count |
| 11             | 1062                      | 9/13                                               |
| 12             | 2                         | 0/3                                                |
| 13             | 147                       | 52/59                                              |
| 14             | 6                         | 2/5                                                |
| 15             | 33                        | 15/15                                              |
| 16             | 2                         | 0/0                                                |
| <b>Total</b>   | <b>1252</b>               | <b>78/95 (82%)</b>                                 |

**Supplementary Table 4.** Expression of vimentin and N-cadherin on CTCs from serial cohorts of 16 women with metastatic progressive breast cancer. The second column is the enumerated CTC count using the approved CellSearch® method, while the third column represents the ratio of EMT marker positive CTCs manually scored compared with the total number of CTCs manually scored from each sample.

**Supplementary Data: Figures**

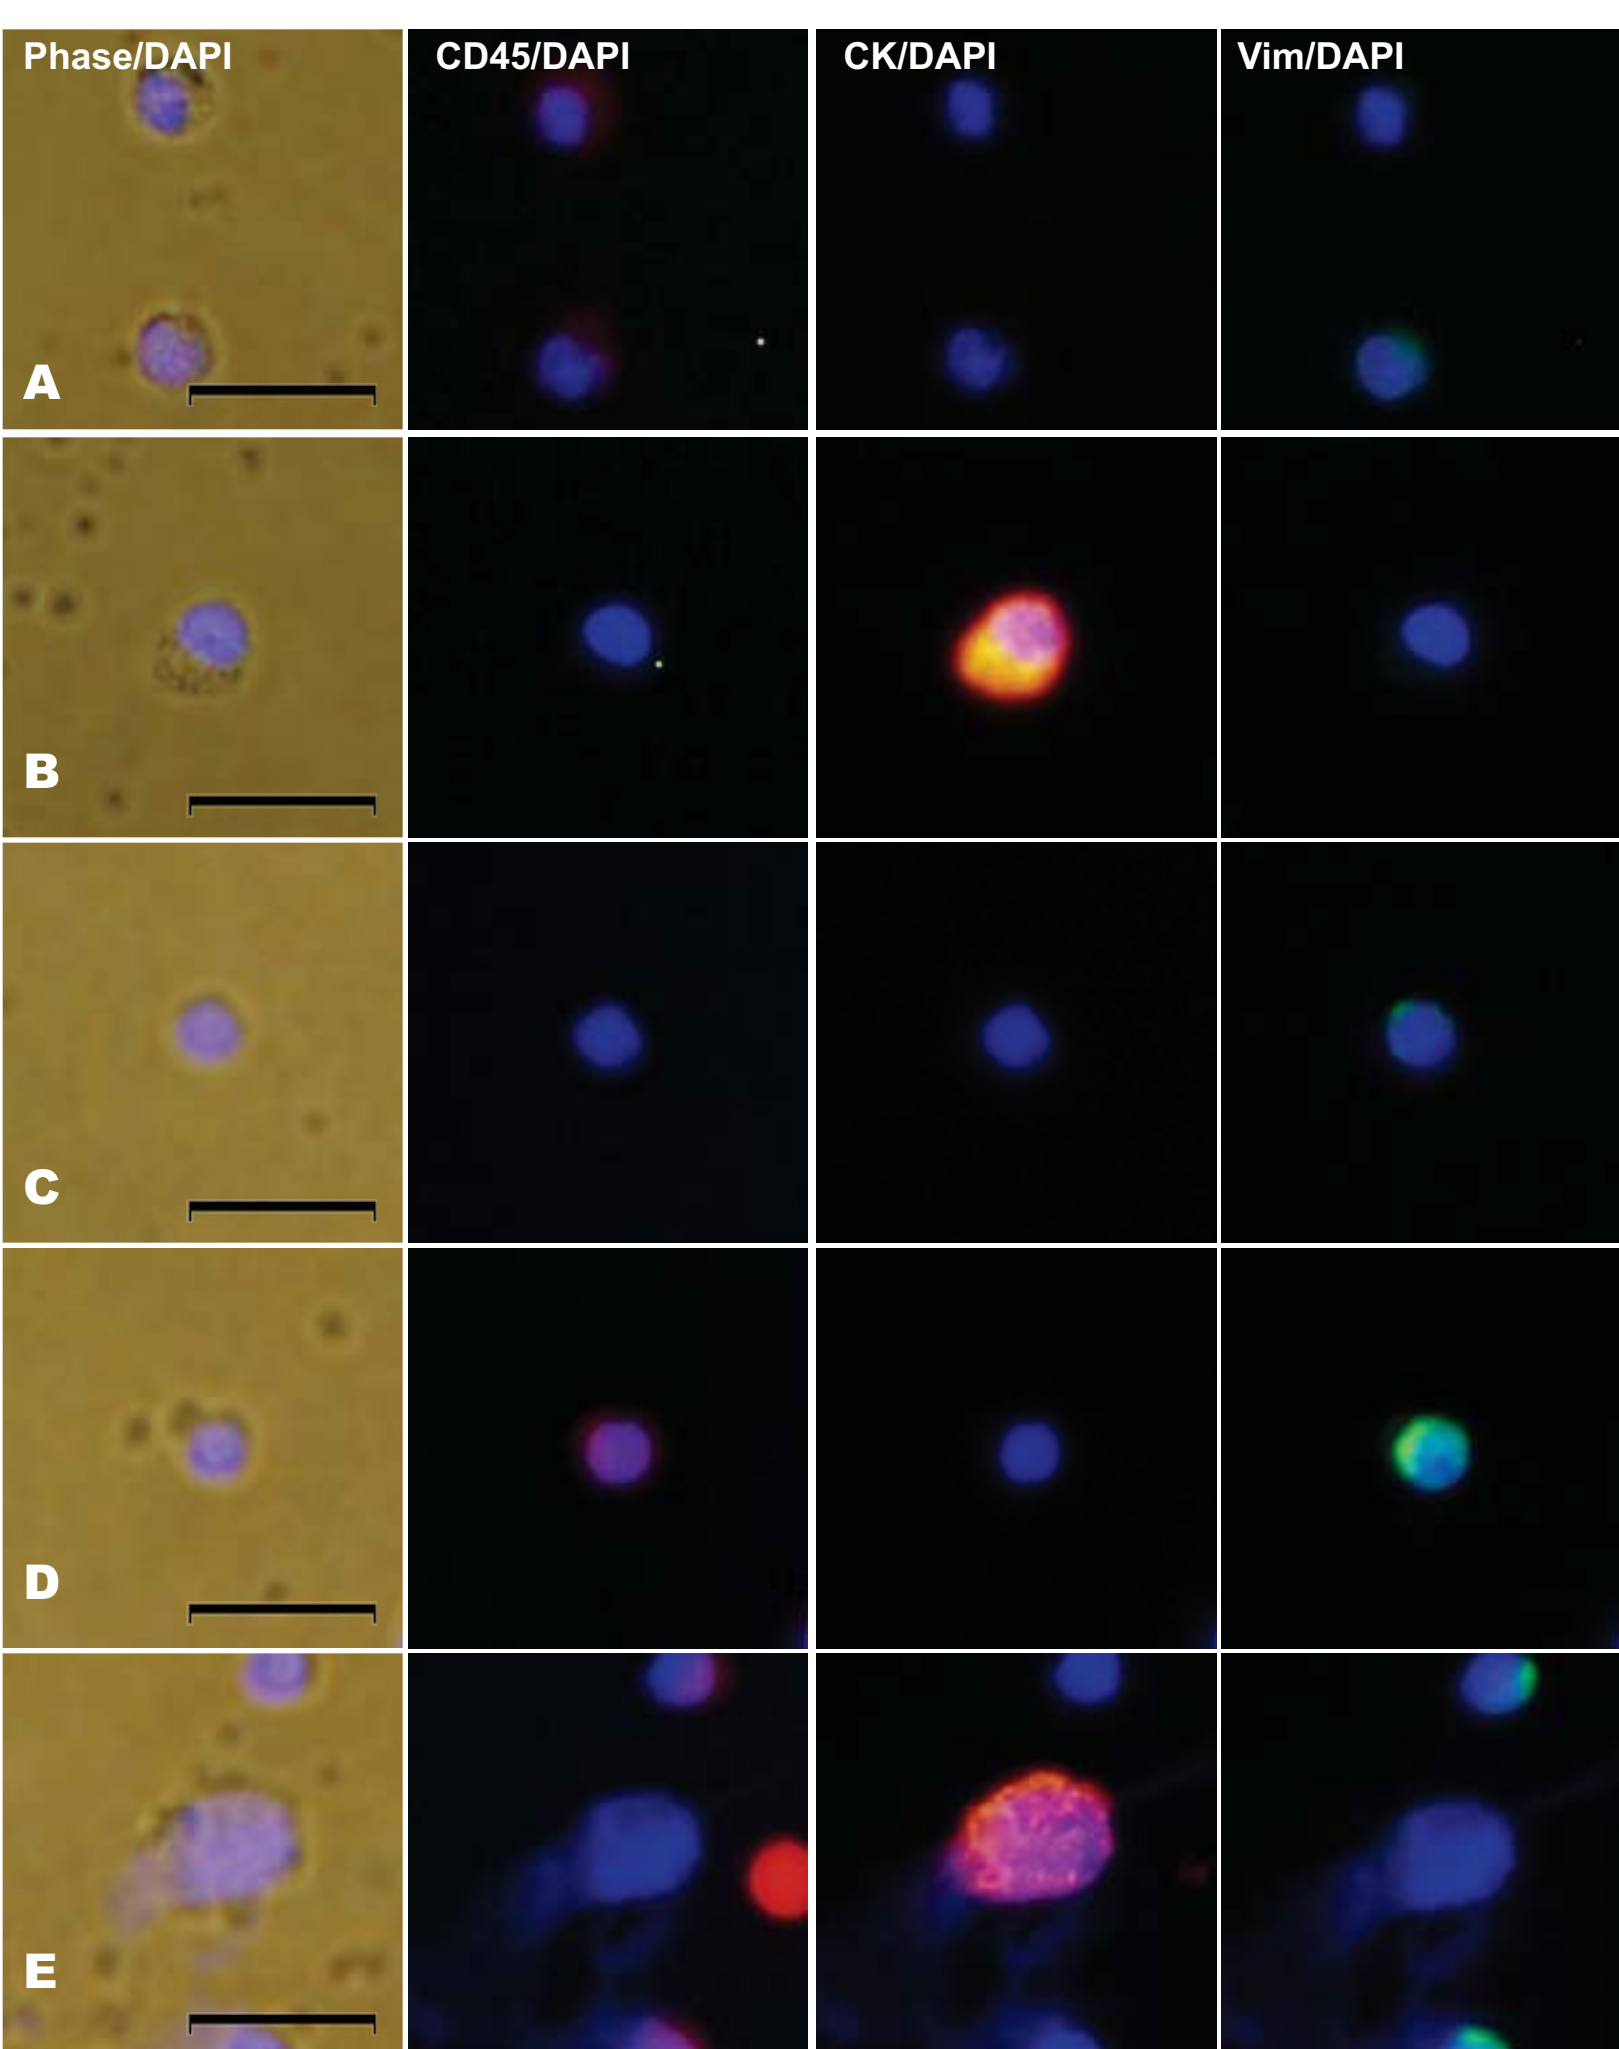

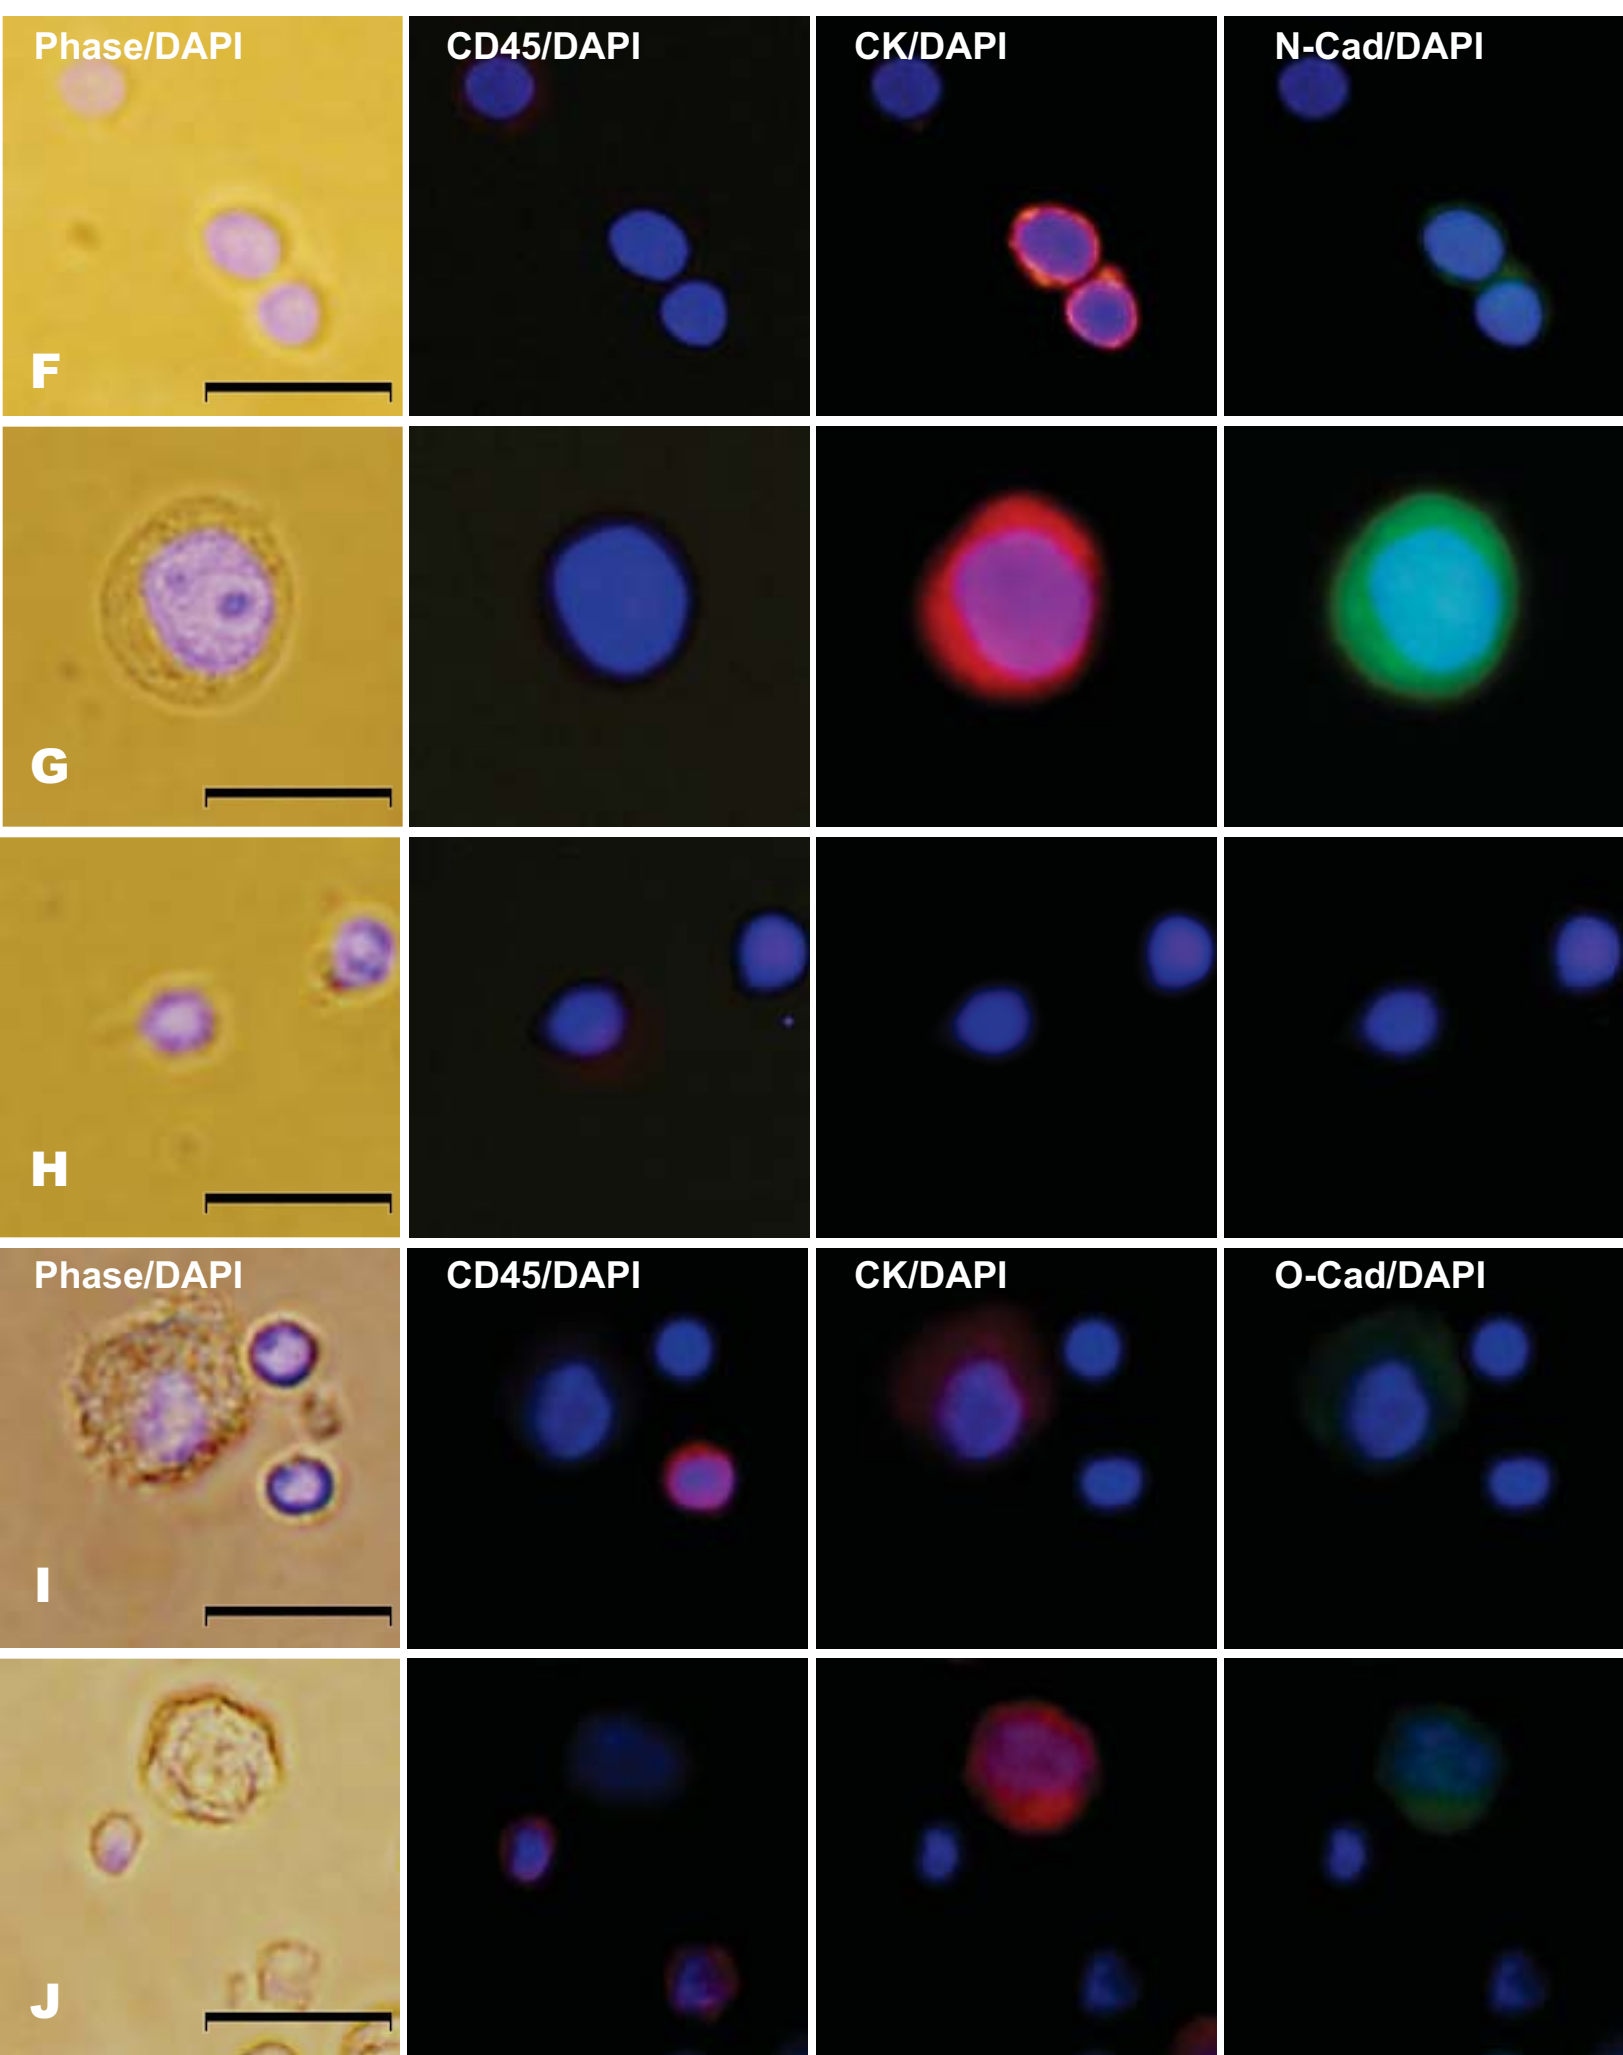

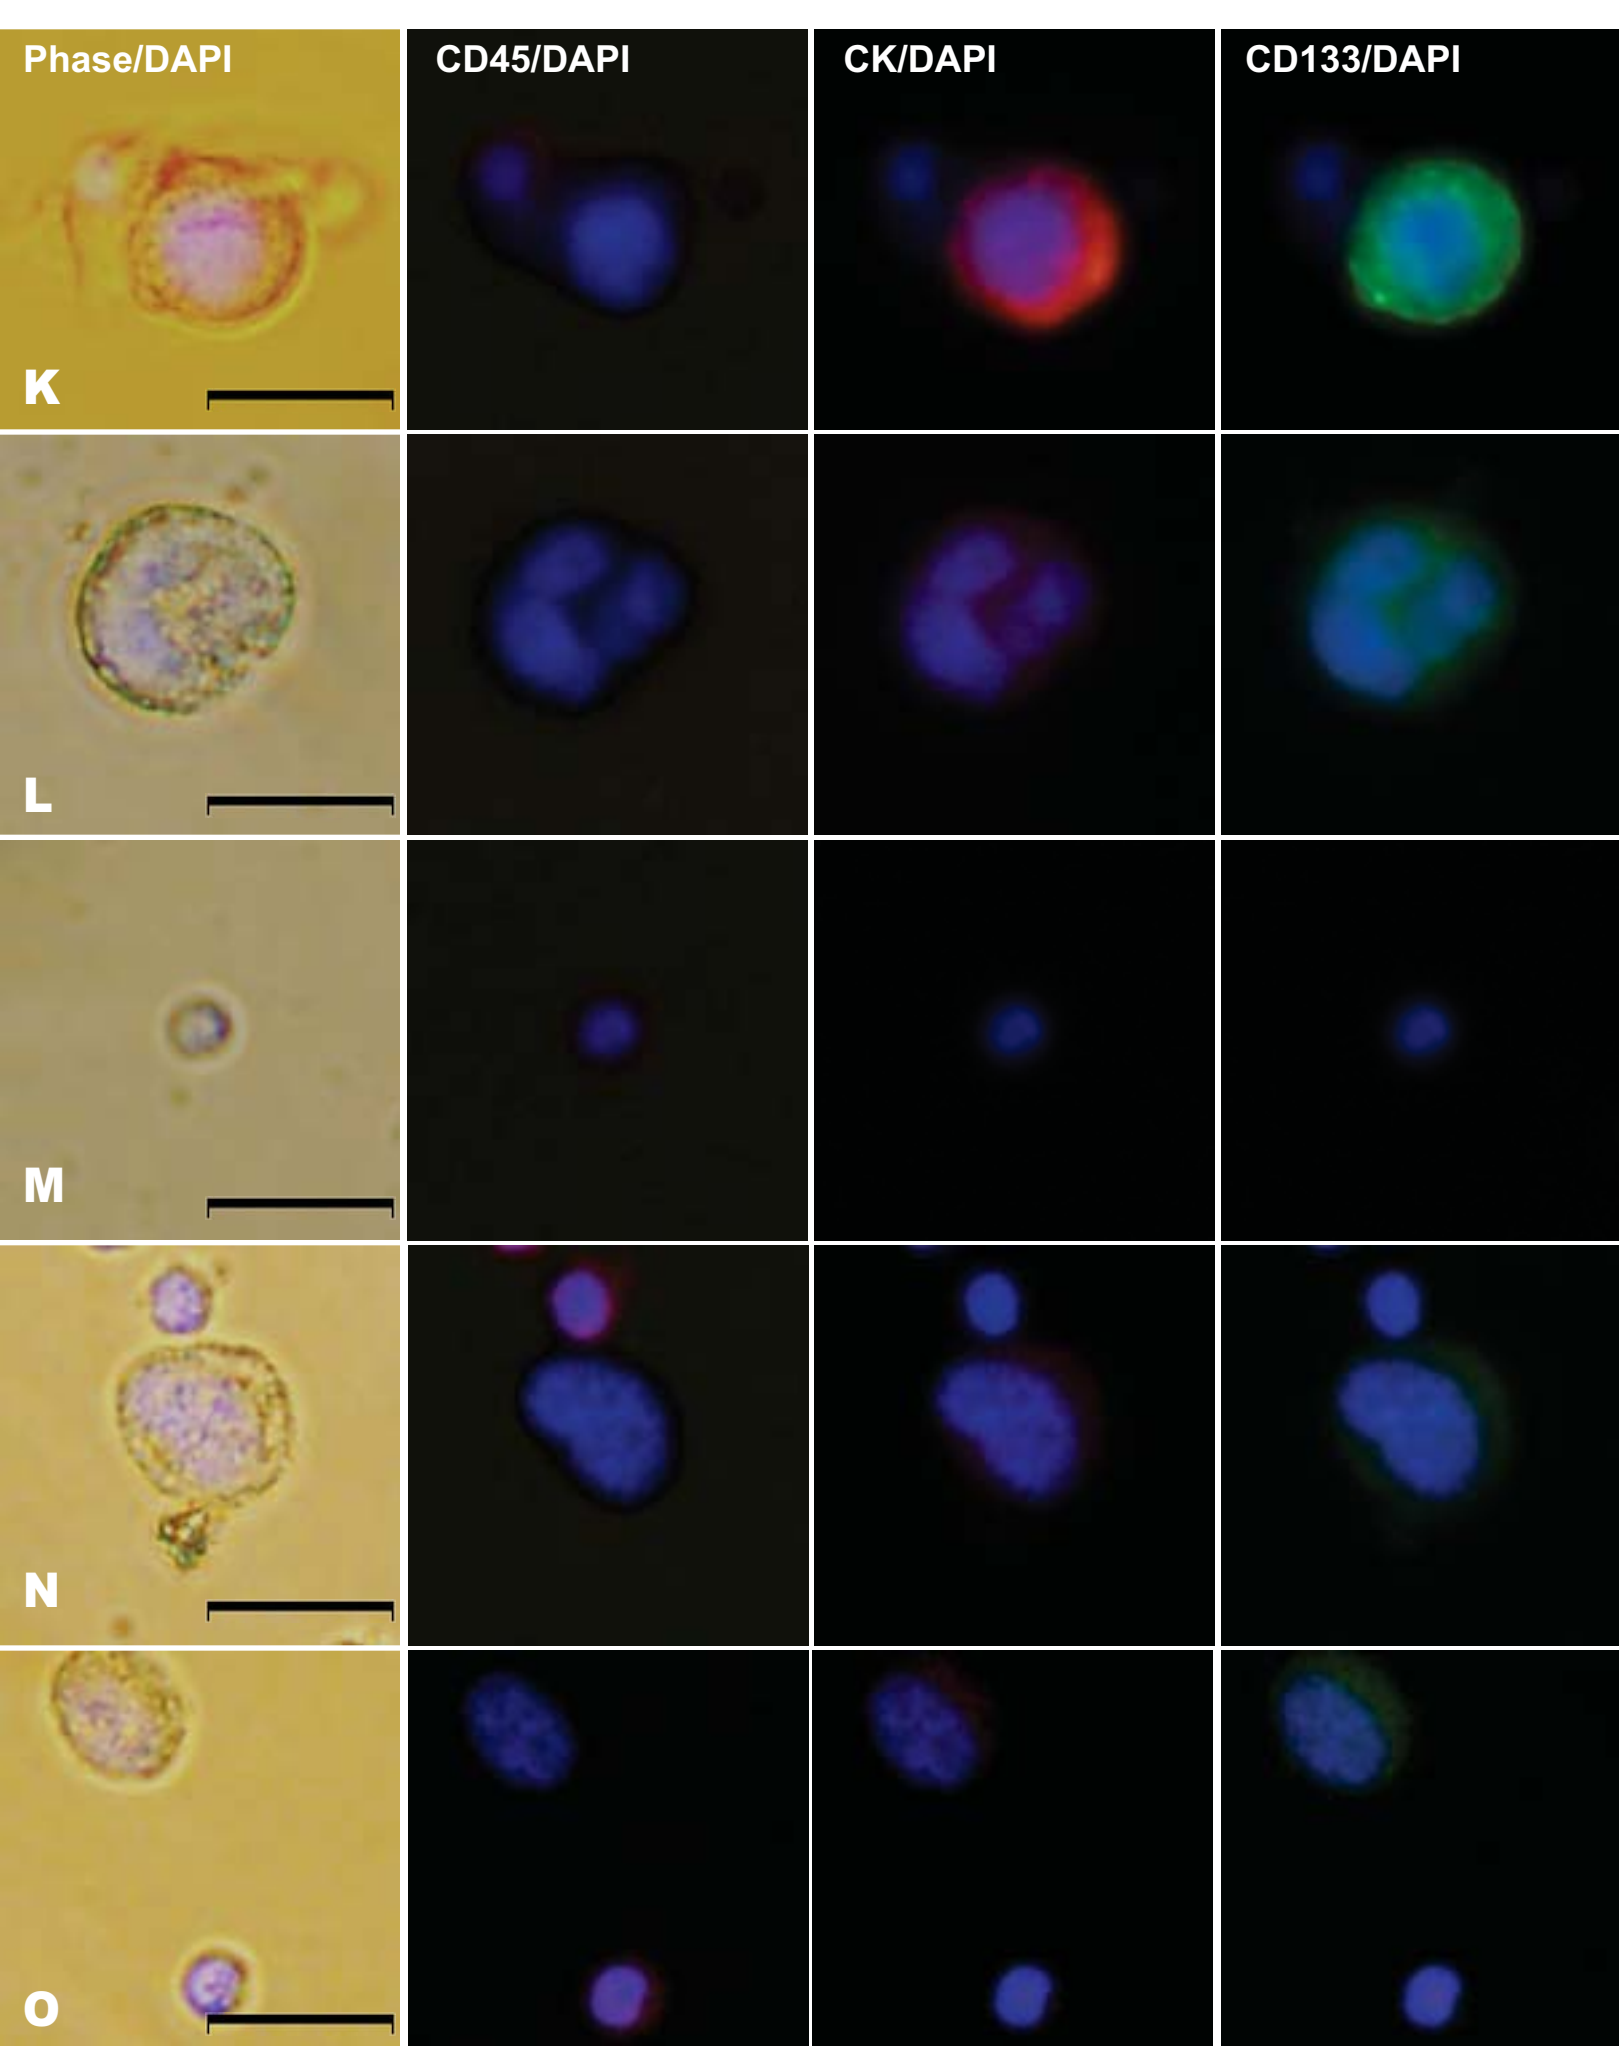



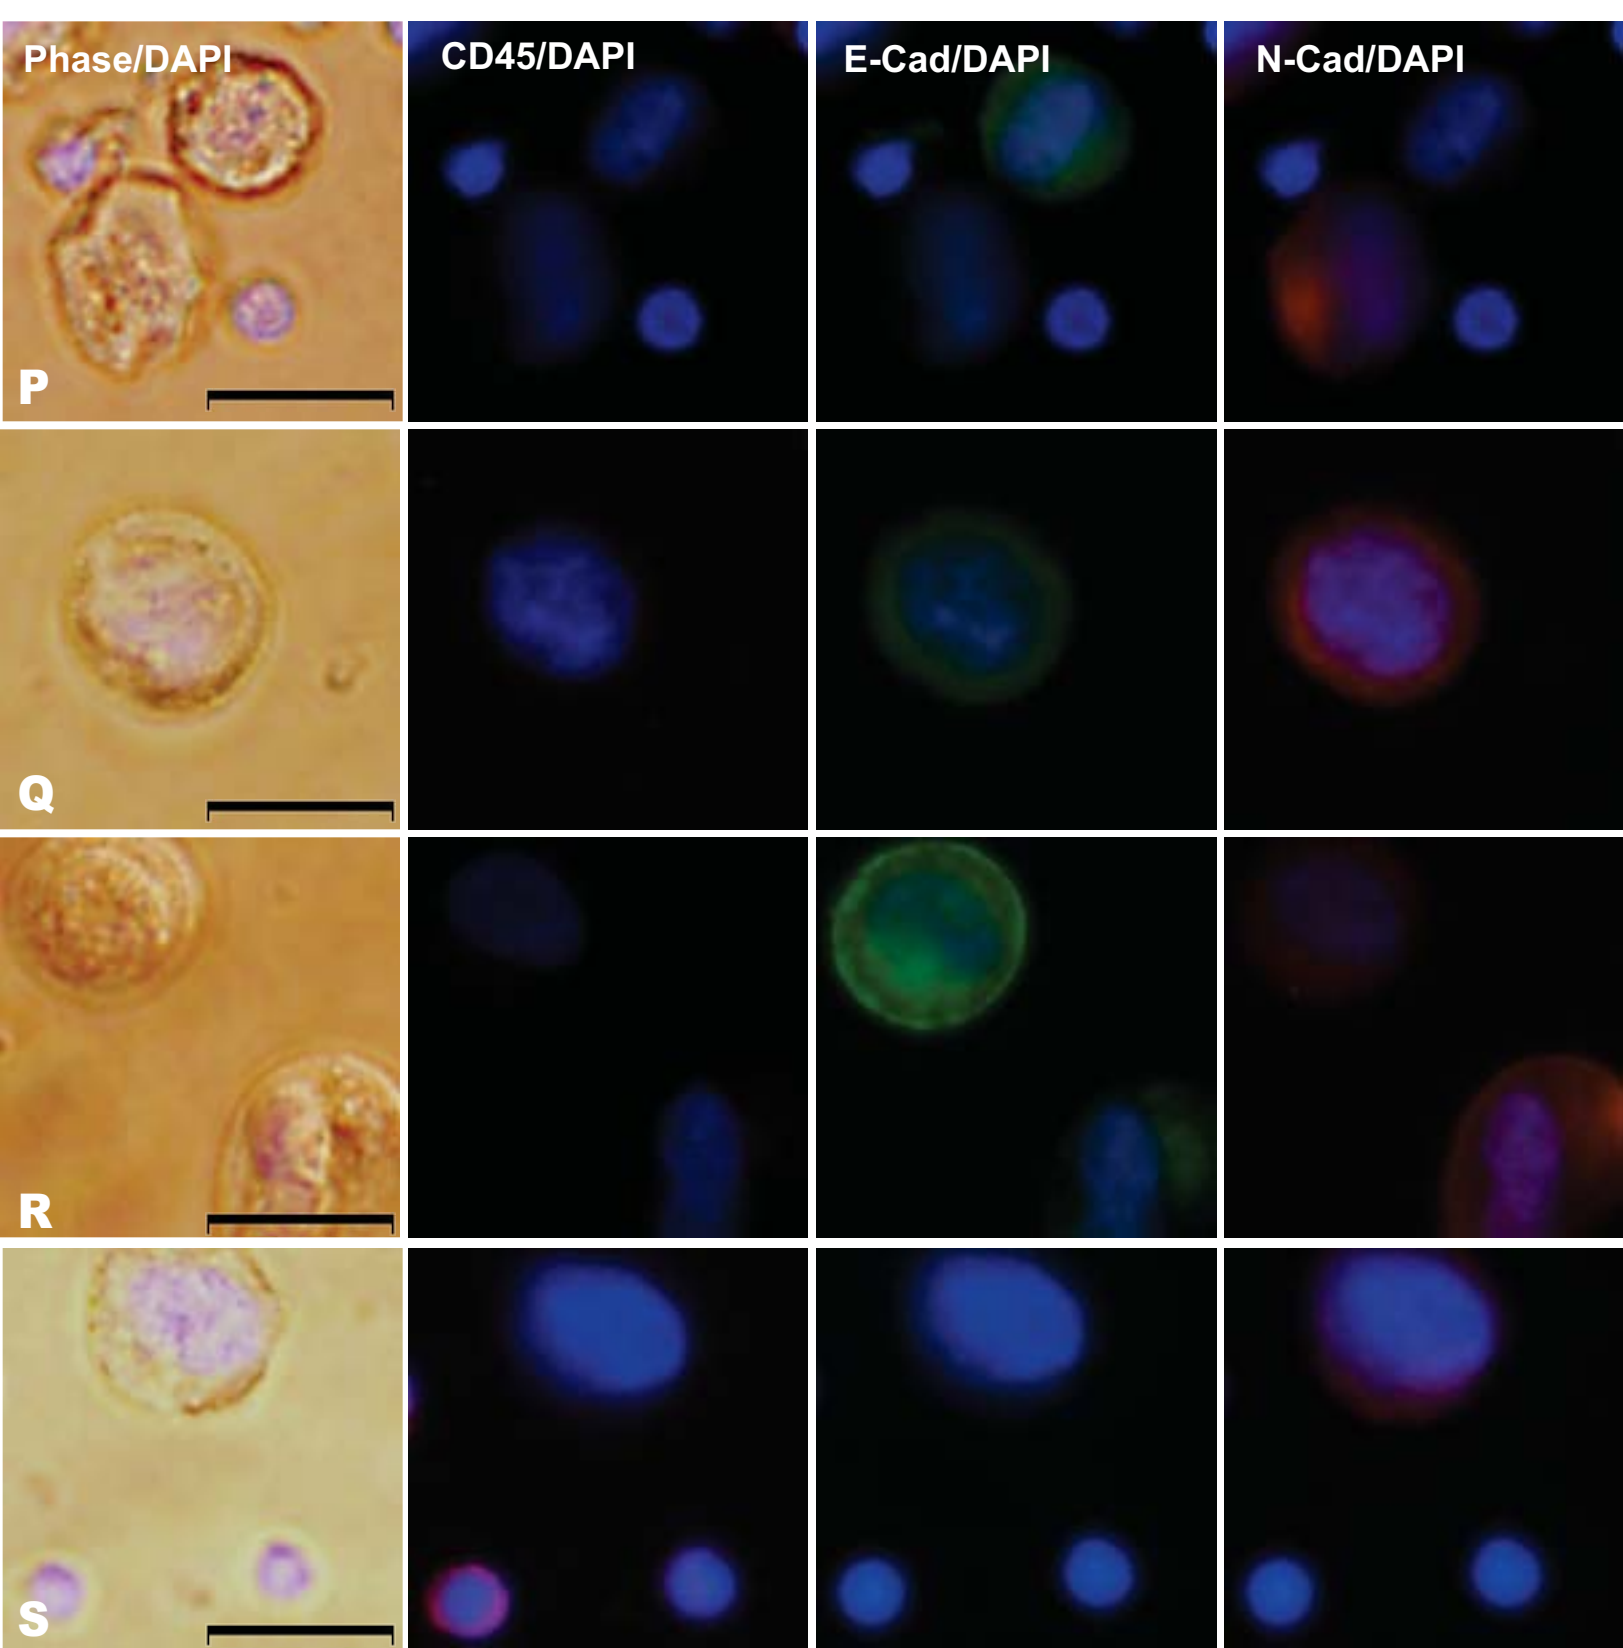

**Supplementary Figure 1**

**Supplementary Figure 1.** Mixtures of control cells were assayed in parallel with the patient samples. Scale bars represent 20  $\mu\text{m}$  and were added from a cell image taken from identical magnification and resolution. (A) Parallel control for Fig. 1A: cells that express CD45, lack CK expression, and have variable vimentin expression. (B) Parallel control for Fig. 1A: cell that lacks CD45 expression, expresses CK and has low expression of vimentin. (C) Parallel control for Fig. 1B and 1C (same patient sample, same day of assay): cell that lacks CD45 and cytokeratin expression and expresses vimentin. (D) Parallel control for Fig. 1B and 1C: cell that expresses CD45 and vimentin but lacks CK expression. (E) Parallel control for Fig. 1B and 1C: cell that lacks CD45 expression, expresses CK, and lacks vimentin expression. Note reciprocal expression in nearby cells. (F) Parallel control for Fig. 1D: cell that expresses CD45 and lacks CK and N-cadherin expression. Nearby, two cells that lack CD45 expression and express CK and N-cadherin. (G) Parallel control for Fig. 1E: cell that lacks expression of CD45 and expresses CK and N-cadherin. (H) Parallel control for Fig. 1E: cell that expresses CD45 and lacks CK and N-cadherin expression. (I) Parallel control for Fig. 1F: one large cell that lacks expression of CD45 and expresses CK and O-cadherin. Note nearby cell with CD45 expression and another nearby cell with no expression of CD45, CK, or O-cadherin. (J) Parallel control for Fig. 1G: two cells with CD45 expression and one cell lacking CD45 and expressing CK and O-cadherin.

(K) Parallel control for Fig. 3A: cell that expresses CD45 and lacks CK and CD133 expression. Nearby, a cell that lacks CD45 expression and expresses CK and CD133. (L) Parallel control for Fig. 3B: cell that lacks CD45 expression and expresses CK and CD133. (M). Parallel control for Fig. 3B: cell that expresses CD45 and lacks CK and CD133 expression. (N) Parallel control for Fig. 3C: cell that expresses CD45 and lacks CK and CD133 expression. A nearby cell lacks CD45 expression and expresses CK and CD133. (O) Parallel control for Fig. 3D: cell that expresses CD45 and lacks CK and CD133 expression. A nearby cell lacks CD45 expression and expresses CK and CD133.

(P) Parallel control for Fig. 4A: one cell with only E-cadherin expression and another cell with only N-cadherin expression. (Q) Parallel control for Fig. 4B and 4C (same patient sample, same day of assay): cell with expression for both E-cadherin and N-cadherin. (R) Parallel control for Fig. 4D: one cell with strong E-cadherin expression and weak N-cadherin expression and a second cell with weak E-cadherin expression and strong N-cadherin expression. (S) Parallel control for Fig. 4E: one cell with only N-cadherin expression and two cells with only CD45 expression.

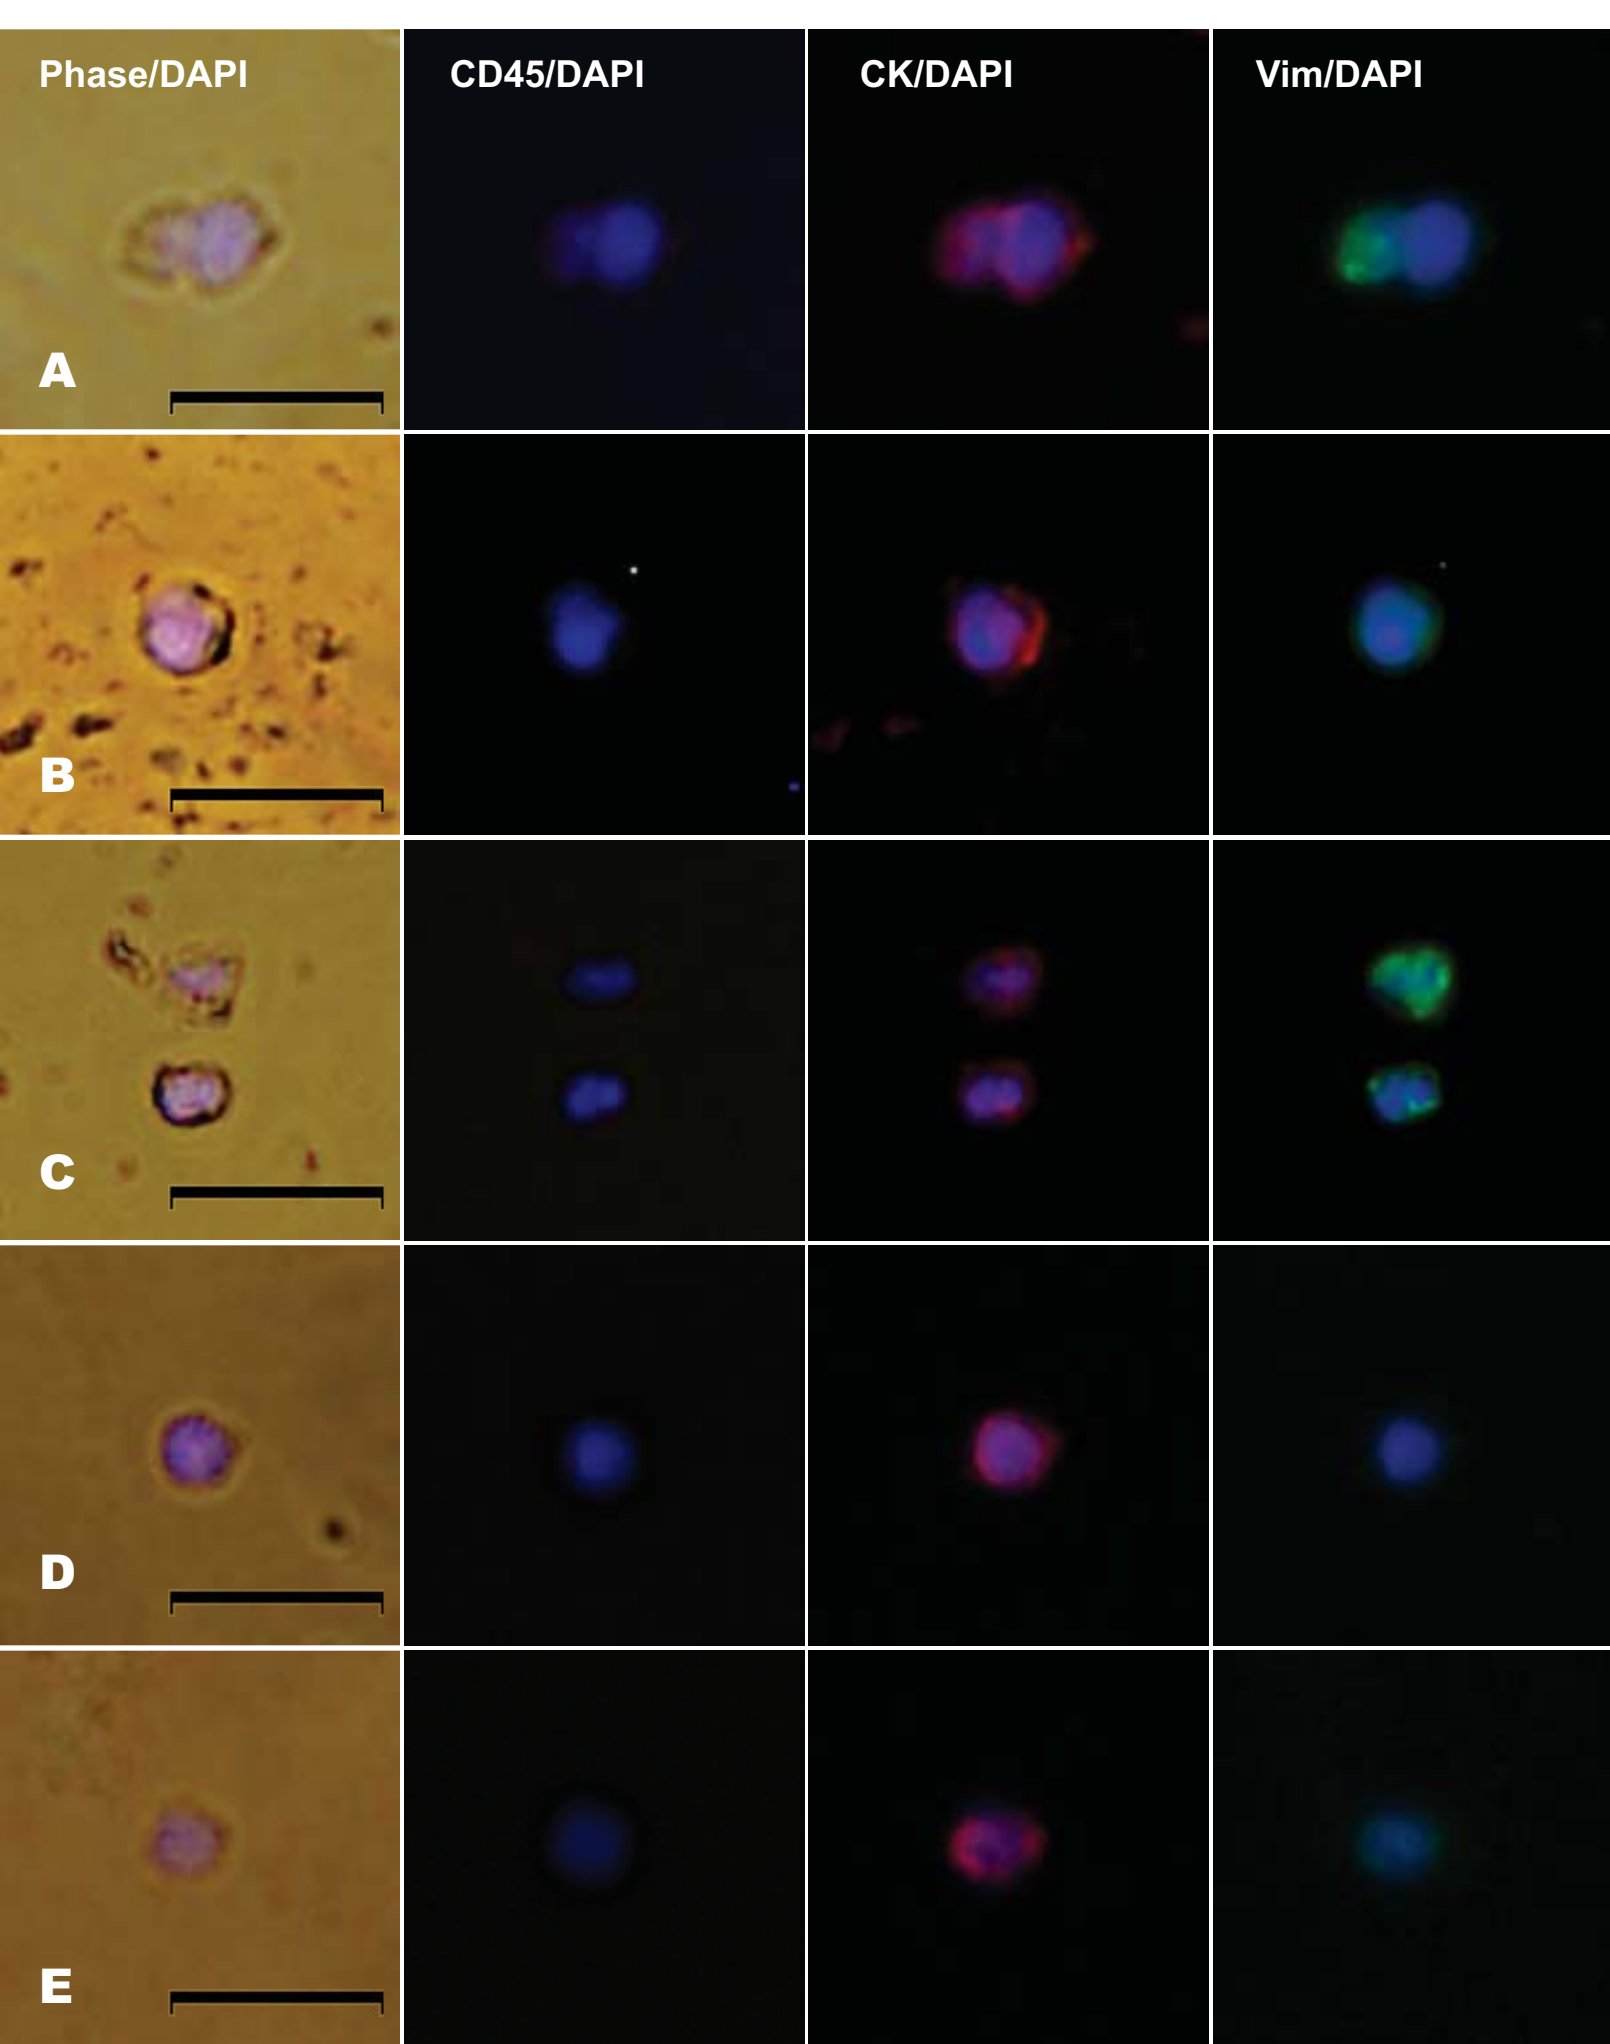

**Supplementary Figure 2**

**Supplementary Figure 2. Additional examples of CTCs based on vimentin**

**expression.** Vimentin expression in CTCs from men with progressive metastatic

CRPC, (A-C) or women with progressive metastatic breast cancer (D,E).

Columns indicate phase/DAPI, CD45/DAPI, CK/DAPI, and vimentin/DAPI

expression as indicated. (A) Two CTCs, one with (left) and one without (right)

vimentin expression. (B,C) Further examples of vimentin positive CTCs. (D) A

CTC from a woman with mBC that lacks vimentin expression. (E) A CTC from a

woman with mBC that expresses vimentin.

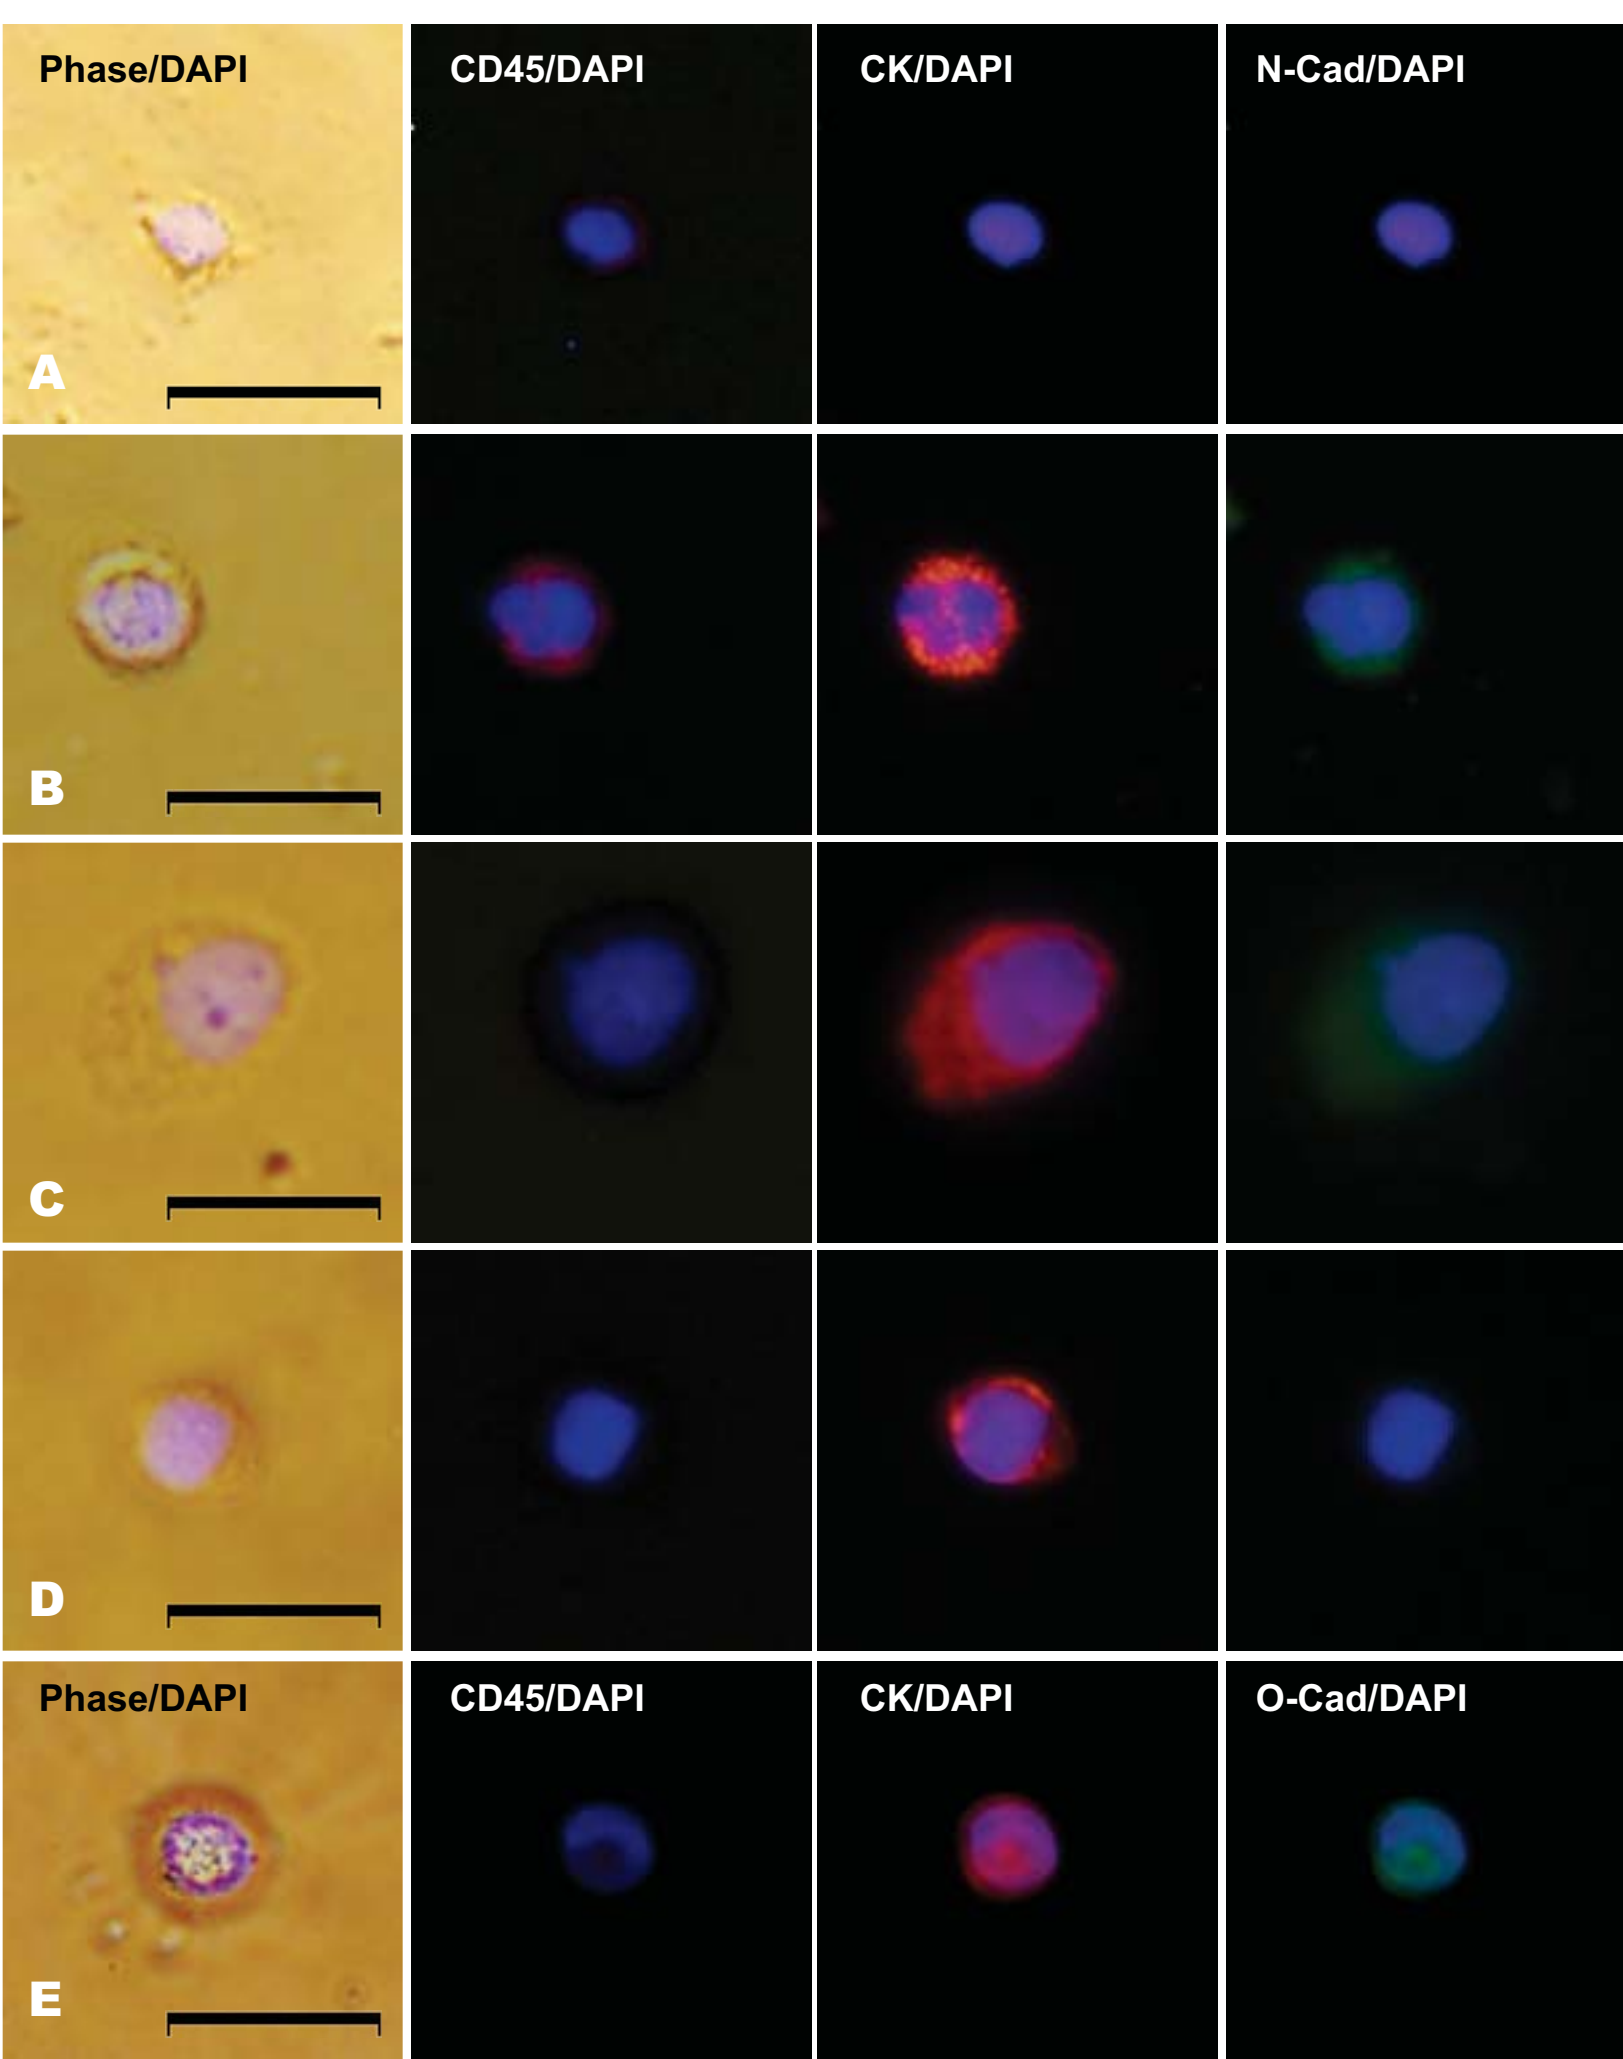

**Supplementary Figure 3**

**Supplementary Figure 3. Additional examples of CTCs based on N-cadherin or O-cadherin expression.**

CTCs from men with progressive metastatic CRPC (A, B, E) and women with progressive mBC (C,D). Scale bars represent 20  $\mu\text{m}$  and were added from a cell image taken from identical magnification and resolution. Columns indicate phase/DAPI, CD45/DAPI, CK/DAPI, and N-cadherin/DAPI or O-cadherin expression as indicated. (A) A patient leukocyte with negative N-cadherin expression. (B) A cell of unknown character that expresses CD45, N-cadherin, and cytokeratin (triple positive cell). (C) A CTC from a woman with mBC that expresses N-cadherin. (D) A CTC from a woman with mBC that lacks N-cadherin expression. (E) A CTC from a man with CPRC with CK and O-cadherin expression and no CD45 expression.

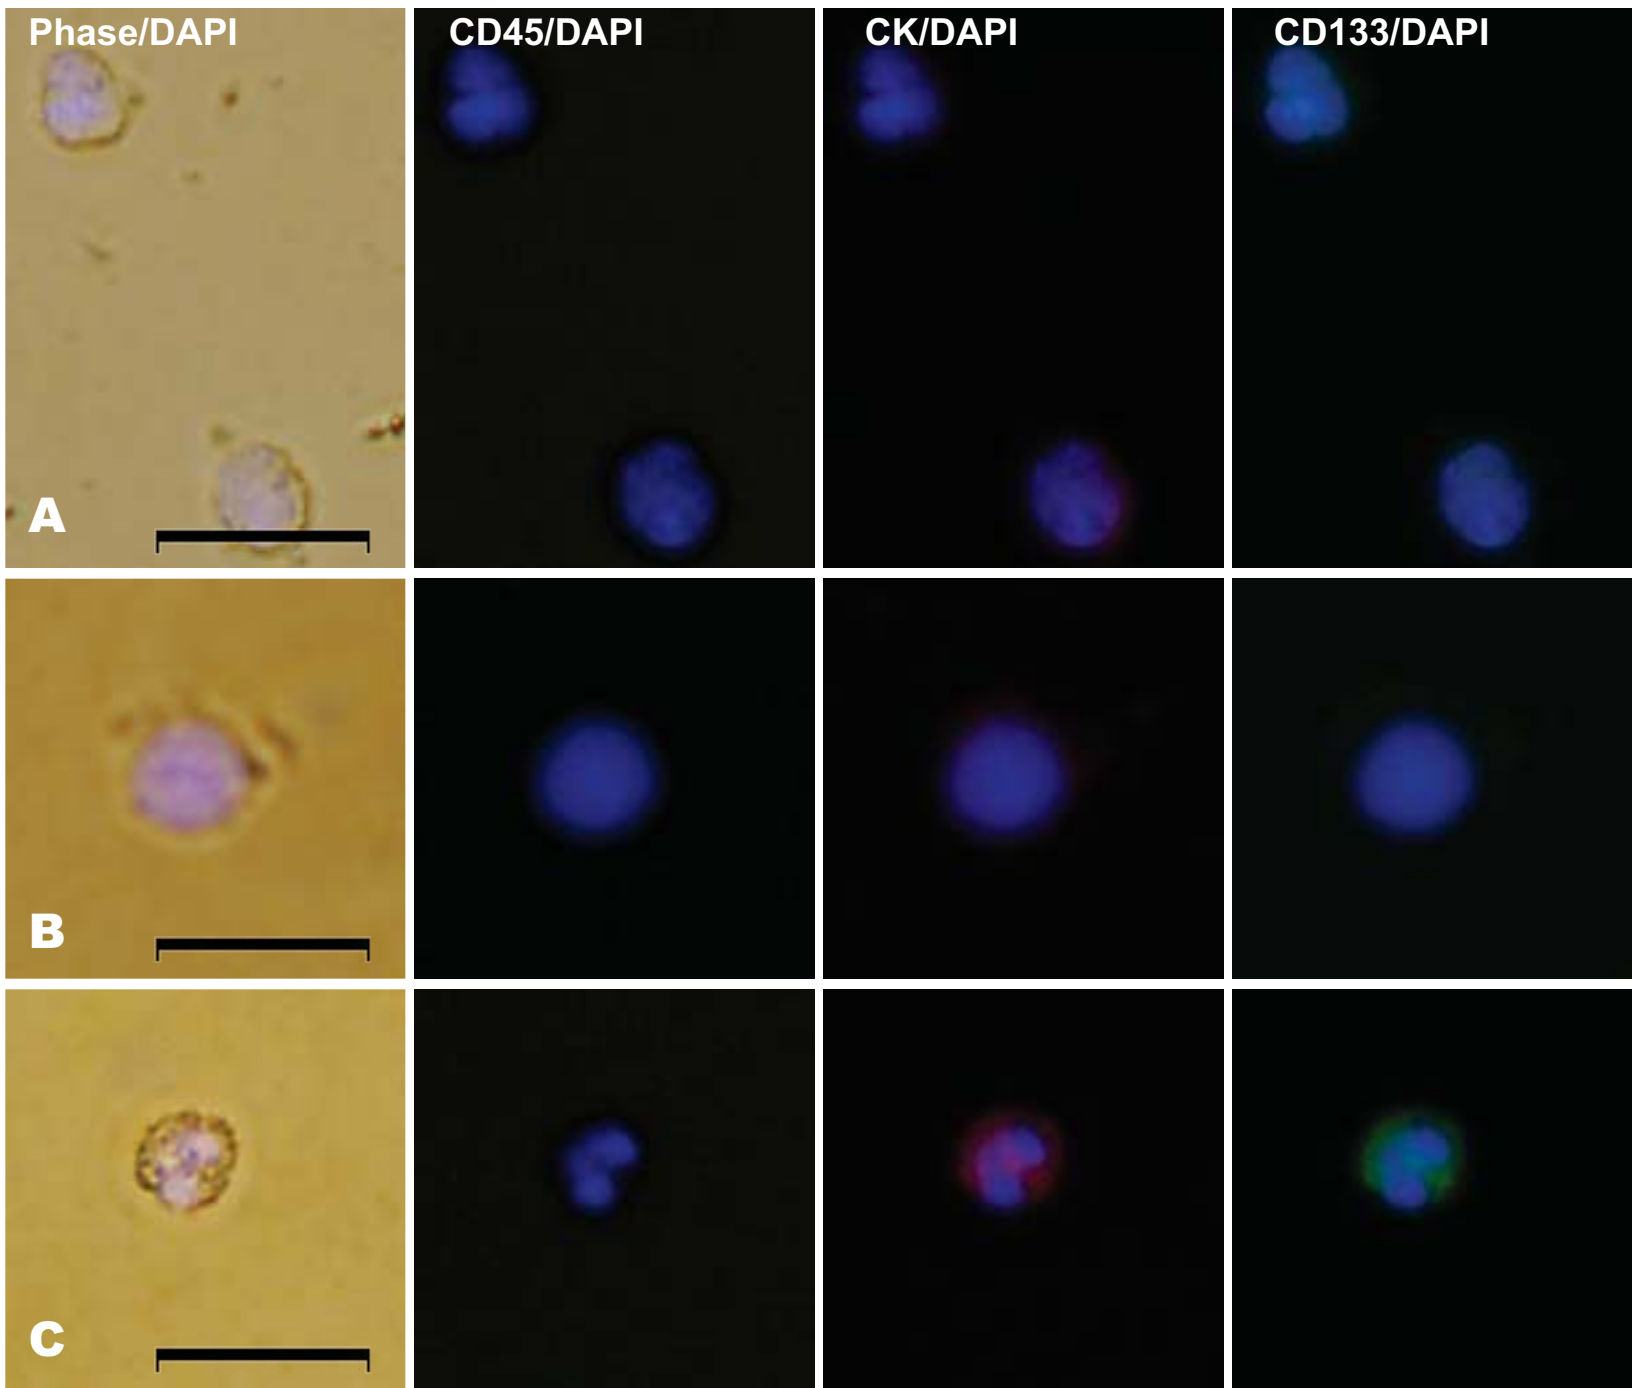

**Supplementary Figure 4**



**Supplementary Figure 4. Additional CTCs based on CD133 expression.** CD133 expression on CTCs from men with progressive metastatic CRPC, (A-C). Scale bars represent 20  $\mu\text{m}$  and were added from a cell image taken from identical magnification and resolution. Columns indicate phase/DAPI, CD45/DAPI, CK/DAPI, and N-cadherin/DAPI expression as indicated. (A) Two cells with variable CK and CD133 expression. (B) A CTC that lacks CD133 expression. (C) A CTC with strong CD133 expression. Because of its nuclear morphology this cell resembled a leukocyte, but given the criteria defined above (CD45 negative and CK positive) it was scored as a CTC.
